# Supplementary material
Source: Research Square preprint supplement (doi:10.21203/rs.3.rs-10299994/v1)
Supplement: Supplementary file 1 [file 5558b7048d95f5a854fa7c60.docx]

**Supplementary Information**

Supplementary Information for “*Perceptions of Robot Experience Reshape Human Social Networks*”

This file provides additional materials, measures, variable-construction details, robustness analyses and statistical syntax for the pilot study, Study 1 and Study 2.

**Supplementary Note 1. Pilot study materials and measures**

Participants were recruited through Credamo between 2022.9.10 and 2022.10.11. Participants were located in China and received around US $5 as compensation. Eligibility criteria required participants to have at least one year of work experience and prior exposure to robots. Participants who did not provide informed consent, failed eligibility screening, failed attention checks, submitted duplicate responses, completed the survey unrealistically quickly or provided incomplete responses were excluded according to pre-specified criteria. The final analytic sample consisted of 448 participants (168 men and 280 women; Mage = 35.73 years; mean work experience = 76.84 months). Participants were randomly assigned to evaluate robot agency (n = 221) or robot experience (n = 227).

Agency items: Participants evaluated the extent to which robots possess agentic capacities, including planning, intentional action and autonomous decision-making. The item wording used in the experimental materials included: "robots can communicate with others", "*robots can think*", "*robots can plan their actions*" and "*robots can remember things*".

Experience items: Participants evaluated the extent to which robots possess experiential capacities, including emotions, feelings and subjective awareness. The item wording used in the experimental materials included: "*robots can fear*", "*robots can feel pain*", "*robots can have desires*" and "*robots can be happy*".

Response scale: 1 = strongly disagree to 7 = strongly agree, unless otherwise stated. In the pilot study, participants attributed greater agency to robots (M = 4.47, SD = 1.36) than experience (M = 3.53, SD = 1.59), t(446) = 6.69, p < .001.

**Supplementary Note 2. Study 1 scenario and manipulation materials**

Participants were recruited through Credamo between 2022.10.21 and 2022.11.20. Participants were located in more than 20 provinces in China and received approximately US$5 as compensation. The final analytic sample consisted of 432 participants after applying the exclusion criteria described in the Methods section (183 men and 249 women; Mage = 35.57 years; mean work experience = 80.74 months). Participants were randomly assigned to the high experience condition (n = 107), low experience condition (n = 108), high agency condition (n = 109) or low agency condition (n = 108).

Full scenario text: Participants were instructed to imagine a work team in which robots and human employees work together. They were introduced to an unfamiliar coworker, Coworker A, whose perception of robots was experimentally manipulated. After reading the scenario, participants indicated their willingness to communicate with Coworker A and seek work-related advice from Coworker A.

High experience perception condition: Coworker A was described as believing that robots can have human emotions. The scenario stated that robots have pain, fear, desire, happiness and other feelings, and can communicate emotional problems with humans.

Low experience perception condition: Coworker A was described as believing that robots cannot have human emotions. The scenario stated that robots do not have pain, fear, desire, happiness or other feelings, and cannot communicate emotional problems with humans.

High agency perception condition: Coworker A was described as believing that robots have the ability to think. The scenario stated that robots can think, communicate, plan and act volitionally, and can communicate job information with humans.

Low agency perception condition: Coworker A was described as believing that robots do not have the ability to think. The scenario stated that robots cannot think, communicate, plan or act volitionally, and cannot communicate job information with humans.

Manipulation-check items: Experience perception was checked with four items: "*A believes that robots can fear*", "A believes that robots can feel pain", "A believes that robots can have desires" and "*A believes that robots can be happy*" (Cronbach's alpha = .95). Agency perception was checked with four items: "*A believes that robots can communicate with others*", "*A believes that robots can think*", "*A believes that robots can plan their actions*" and "*A believes that robots can remember things*" (Cronbach's alpha = .95).

Attention-check items and exclusion rule. Participants completed an attention-check item instructing them to select the neutral option on the response scale: “To show that you are reading the questions carefully, please select ‘neutral’ for this item.” Participants who failed to select the neutral option were excluded from the analysis. The online platform prevented duplicate participation, and responses were excluded if participants failed eligibility or attention checks, submitted duplicate responses, completed the survey unrealistically quickly or provided incomplete responses.

**Supplementary Note 3. Study 2 field setting, participant flow and exclusions**

Study 2 was conducted in a year-long robot-design competition in China. The competition provided a naturalistic setting in which robot perceptions, within-team communication networks and performance outcomes could be measured across multiple waves.

Participant-flow details: The competition involved 146 robot-design teams and 5,654 members. At Time 1, 3,776 participants completed the first survey (response rate = 66.78%). At Time 2, valid social-network and task-performance data were obtained from 3,416 participants in 142 teams (response rate = 90.47% among Time 1 respondents). At Time 3, award information was collected after all competition rounds ended. The final analytic sample consisted of 3,416 participants nested within 142 teams.

Team-level exclusion criteria: Teams were retained when they had valid team-level network information and sufficient member responses to construct within-team communication networks. Four teams from the original 146 teams were not included in the final analytic sample because valid Time 2 network and performance data were not available.

Missing-data handling: Analyses used the final valid analytic sample with complete information for the focal survey waves, roster-based network variables and performance outcomes. Participants or teams with missing key variables, invalid network information or insufficient team-level network data were excluded from the corresponding analyses.

**Supplementary Note 4. Measures and variable construction**

Perceived robot agency and perceived robot experience were measured at Time 1 using seven-point Likert-type items, with higher values indicating stronger attribution of the corresponding mind capacity. Agency perception included items reflecting communication, thinking, planning/action and memory (Cronbach's alpha = .83 in Study 2). Experience perception included items reflecting fear, pain, desire and happiness (Cronbach's alpha = .91 in Study 2).

Individual in-degree centrality, team-level variability in experience perception and team network density were constructed from the roster-based communication data. The mathematical definitions of these variables are provided in the Measures section of the main manuscript. In brief, in-degree centrality captures the normalized weighted sum of incoming communication ties received by a focal member, team-level variability in experience perception captures the within-team standard deviation of members’ experience-perception scores, and team network density captures the average weighted strength of directed communication ties across all possible directed ties within the team.

Individual task performance was rated by team leaders at Time 2 with four items adapted from Wayne and Liden (1995), including "*This member's performance is superior to other employees in my team*" and "*Overall, to what extent do you feel that this team member has been effectively fulfilling his or her roles and responsibilities?*" (Cronbach's alpha = .94). Team performance was measured using objective award information collected after the competition. Among the 142 teams, 23 won first prize, 24 won second prize, 48 won third prize and 47 did not win a prize; awards were coded from 0 = no prize to 3 = first prize.

Control variables. All participants’ age, gender, and agency perception were controlled at the individual level as prior studies find demographic variables can significantly influence network position. Agency perception was controlled to isolate the effects of experience perception from general mind attribution to robots. Team size, team variability of agency perception, and team mean level of agency perception were controlled at the team level as prior studies suggest that network structure is highly sensitive to the size of the whole network. Time spent on the competition was controlled because work involvement may influence both communication opportunities and performance. This variable was based on digital time-recording traces from the working rooms. We did not control participants’ education since they were all undergraduate students when we conducted the survey.

**Supplementary Note 5. Statistical modelling details**

Experimental ANOVA analyses were conducted in Stata 18, and multilevel path analyses were conducted in Mplus 8.3. Individual-level predictors and outcomes were modelled at Level 1, and team-level predictors and outcomes were modelled at Level 2. Continuous predictors were standardized before analysis. The models used maximum likelihood estimation and reported standardized coefficients. Indirect effects and conditional indirect effects were estimated with 95% confidence intervals in Mplus. Missing data were handled by retaining cases with valid focal variables for the relevant analysis.

**Supplementary Note 6. Ethics, materials repository and data availability**

All participants provided informed consent before participation. The pilot study and Study 1 were conducted through an online participant-recruitment platform, and Study 2 was conducted in collaboration with the competition organizer. Participation was voluntary, and the data were analysed and reported in anonymized form. At the time of data collection, the authors’ institutions did not require formal institutional review board approval for anonymous, minimal-risk survey research of this type.

The studies were not prospectively preregistered. Study materials, de-identified data, variable-construction documentation and analysis code are available in the OSF materials repository at https://osf.io/hr3gn/overview?view_only=47ddcafee7e942289b3d794ab0c6792f. Public release of raw roster-level network data is restricted where disclosure could create a risk of re-identification because participants were embedded in identifiable competition teams. Where such restrictions apply, aggregated data and variable-construction documentation are provided to support reproducibility.

**Supplementary Table 1. Means, standard deviations, reliabilities and correlations among Study 2 variables.**

| Variable | *Mean* | *SD* | 1 | 2 | 3 | 4 | 5 | 6 | 7 |
| --- | --- | --- | --- | --- | --- | --- | --- | --- | --- |
| Individual-Level Variables |  |  |  |  |  |  |  |  |  |
| 1. Age | 20.74 | 1.16 |  |  |  |  |  |  |  |
| 2. Gender | 1.18 | .38 | -.14*** |  |  |  |  |  |  |
| 3. Time (Hours) | 174.08 | 158.34 | .11*** | -.10*** |  |  |  |  |  |
| 4. Agency Perception | 5.49 | 1.21 | .01 | -.08*** | .02 | (.83) |  |  |  |
| 5. Experience Perception | 3.41 | 1.68 | -.03 | .02 | .05** | .36*** | (.91) |  |  |
| 6. In-degree Centrality | .99 | .55 | .22*** | -.12*** | .30*** | -.01 | -.03 |  |  |
| 7. Task Performance | 5.14 | 1.22 | .13*** | -.10*** | .12*** | .03+ | -.03+ | .29*** | (.94) |
|  |  |  |  |  |  |  |  |  |  |
| Team-Level Variables |  |  | 8 | 9 | 10 | 11 | 12 | 13 | 14 |
| 8. Team Size | 24.06 | 9.37 |  |  |  |  |  |  |  |
| 9. Variability of Agency Perception | 1.19 | .26 | -.13 |  |  |  |  |  |  |
| 10. Mean Agency Perception | 5.47 | .32 | .12 | -.61*** |  |  |  |  |  |
| 11. Variability of Experience Perception | 1.65 | .23 | .09 | .24** | .12 |  |  |  |  |
| 12. Mean Experience Perception | 3.40 | .41 | .06 | -.06 | .20* | .18* |  |  |  |
| 13. Team Network Density | 1.11 | .45 | -.72*** | .07 | -.09 | -.19* | .05 |  |  |
| 14. Team Performance | 1.16 | 1.06 | .18* | -.12 | .32*** | .00 | .05 | .06 |  |

***Note.*** *+ p < .10, * p < .05, ** p < .01, *** p < .001. Individual level: N = 3416; Team level: N = 142. Gender: males are coded as “1”, females are coded as “2”. Cronbach’s α is shown in parentheses.*

**Supplementary Table 2. Results of the multilevel path analyses with out-degree centrality as the mediator.**

| Outcomes | Individual Level | | Team Level | |
| --- | --- | --- | --- | --- |
| Out-degree Centrality | Task Performance | Team Network Density | Team Performance |
| Individual-Level Predictors |  |  |  |  |
| Age | .05(.01)*** | .06(.01)*** |  |  |
| Gender | -.12(.03)*** | -.13(.04)** |  |  |
| Time (Hours) | .00(.00)*** | .00(.00)* |  |  |
| Agency Perception | .01(.01) | .01(.01) |  |  |
| Experience Perception | .00(.01) | -.03(.00)** |  |  |
| Out-degree Centrality |  | .90(.06)*** |  |  |
|  |  |  |  |  |
|  |  |  |  |  |
| Team-Level Predictors |  |  |  |  |
| Team Size |  |  | -.72(.04)*** | .44(.11)*** |
| Mean Agency Perception |  |  | .01(.08) | .43(.10)*** |
| Variability of Agency |  |  | .04(.08) | .19(.10)+ |
| Mean Experience Perception |  |  | -.82(.44)+ | -.53(.60) |
| Variability of Experience |  |  | -1.24(.52)* | -.60(.70) |
| Team Network Density |  |  |  | .40(.11)*** |
|  |  |  |  |  |
| Interaction |  |  |  |  |
| Variability of Experience * Mean-level of Experience |  |  | .64(.30)* | .76(.97) |
| *R*2 | .79 | .04 | .57 | .22 |

***Note.*** + *p* < .10,* *p* < .05,** *p* < .01, *** *p* < .001.Individual level: *N* = 3416; Team level: *N* = 142.

**Supplementary Table 3. Conditional indirect effects of robot experience perception on task performance and team performance.**

| Predictor | Mediator | Moderator | Outcome | Indirect Effect | *p*-value | Lower CI | Upper CI |
| --- | --- | --- | --- | --- | --- | --- | --- |
| Experience Perception | In-degree Centrality | - | Task Performance | -.01+ | .10 | -.01 | .00 |
| Team Variability of Experience Perception | Team Network Density | (Unconditional) | Team Performance | -.29* | .04 | -.53 | -.06 |
| Team Mean Experience High (+1 SD) | .00 | .99 | -.29 | .29 |
| Team Mean Experience Low (-1 SD) | -.49* | .02 | -.83 | -.15 |
| Difference (+1 SD / -1 SD) | .49+ | .07 | .05 | .94 |

***Note.***+ *p* < .10,* *p* < .05; CI = Confidence Interval. High and low levels of team mean experience perception refer to +1 s.d. and −1 s.d., respectively.

**Supplementary Code 1. Stata syntax for the ANOVA analyses in Pilot Study and Study 1.**

**Pilot Study:**

ttest Perceptionofrobots, by(condition)

sum Experience Agency

**Study 1:**

* condition coding:

* 1 = High experience

* 2 = Low experience

* 3 = High agency

* 4 = Low agency

tabstat li, by(condition) stat(n mean sd min max)

anova li condition

**Supplementary Code 2. Mplus syntax for the multilevel path analyses in Study 2.**

TITLE:

Full multilevel path model for Study 2.

DATA:

FILE IS data.csv;

Variable: Names are

uid

age gen hour

wapa wape

iind walpr

size aepa aepe

iden tp sdaepa

sdaepe mode;

Usevariables are

uid

age gen hour

wapa wape

iind walpr

size aepa aepe

iden tp sdaepa

sdaepe mode;

Cluster = uid;

Between =

size aepa aepe

iden tp sdaepa

sdaepe mode;

Within =

age gen hour

wapa wape

iind walpr;

Analysis:

Type = Twolevel;

Estimator=ML;

Processors=16;

Model:

%BETWEEN%

iden ON

size aepa sdaepa

aepe sdaepe mode;

tp ON

size aepa sdaepa

aepe sdaepe

iden

mode;

%WITHIN%

walpr ON

age gen hour

wapa wape iind;

iind ON

age gen hour

wapa wape;

Output:

Tech1 Tech5 Tech8;

Standardized;

Cint;
